# Supplementary material
Source: publisher site journal article supplement (https://en-cdn.bio-protocol.org/attached/file/20180626/2922%20Appendix%203.docx)
Supplement: Supplementary file 1 [file 2922%20Appendix%203.docx]

**Appendix 3: FASTA protein sequences of NisR and NisK in *L. lactis* subsp. *lactis* KF147**

>NisR_*Lactococcus*_*lactis*_*lactis*_KF147_accession_number_ADA64983.1

VVYKILIVDDDQEILKLMKTVLEMRNYEVVTHQNISLPLDITDFQGFDLILLDIMMSNIEGTEICKRIRREISTPIIFVSAKDTEEDIINGLGIGGDDYITKPFSLKQLVAKVEANIKREERNKHAVHVFSEIRRDLGPITFYLEERRVCVNGQTIPLTCREYDILELLSQRTSKVYTREDIYDDVYDEYSNALFRSISEYIYQIRSKFAPYDINPIKTVRGLGYQWHG

>NisK_*Lactococcus_lactis_lactis*_KF147_acession_number_ADA64982.1

MGKKYSMRRRIWQAVIEIIIGTCLLILLLLGLTFFLRQIGQISGSETIRLSLDSDNLTISDIERDMKHYPYDYIIFDNDTSKILGGHYVKSDVPSFVASKQSSHNITEGEITYTYSSNKHFSVVLRQNSMPEFTNHTLRSISYNQFTYLFFFLGEIILIIFSVYHLIREFSKNFQAVQKIALKMGEITTFPEQEESKIIEFDQVLNNLYSKSKELAFLIEAERHEKHDLSFQVAALSHDVKTPLTVLKGNIELLEMTEVNEQQADFIESMKNSLTVFDKYFNTMISYTKLLNDENDYKARISLEDFLIDLSVELEELSTTYQVDYQLVKKTDLTTFYGNTLALSRALINIFVNACQYAKEGEKIVSLSIYDDEKYLYFEIWNNGHPFSEQAKKNAGKLFFTEDTGRSGKHYGIGLSFAQGVALKHQGNLILSNPQKGGAEVILKIKK
